# Supplementary material
Source: publisher figshare collection journal article supplement (https://tandf.figshare.com/ndownloader/files/9659005)
Supplement: Supplementary file 1 [file 9659005]

Pre-Workshop Questionnaire – Sample Questions

Closed-Ended Questions

1. To what site will you be traveling for your international clinical elective?
2. What do you think is the likelihood that a medical student will experience an ethical dilemma while on an international clinical elective? [Scale 0%-100%]
3. How prepared do you feel to appropriately manage an ethical dilemma while on an international clinical elective? [Unprepared, Somewhat unprepared, Neither prepared nor unprepared, Somewhat prepared, Prepared]
4. Please rate your ability to do each of the following [Low, Moderately Low, Moderate, Moderately High, High]:
   1. Describe at least 3 categories of ethical dilemmas that a student may face on an international clinical elective
   2. Identify ways that a student can prepare for the dilemmas they might face
   3. Name individuals to contact when faced with an ethical dilemma at an international site
   4. Identify strategies for managing conflicting impulses, emotions, and motivations when facing an ethical dilemma

Free Response Questions

1. What ethical dilemmas do you anticipate encountering during your international clinical elective?

Post-Workshop Questionnaire – Sample Questions

Closed-Ended Questions

1. What do you think is the likelihood that a medical student will experience an ethical dilemma while on an international clinical elective? [Scale 0%-100%]
2. How prepared do you feel to appropriately manage an ethical dilemma while on an international clinical elective? [Unprepared, Somewhat unprepared, Neither prepared nor unprepared, Somewhat prepared, Prepared]
3. Please rate your ability to do each of the following [Low, Moderately Low, Moderate, Moderately High, High]:
   1. Describe at least 3 categories of ethical dilemmas that a student may face on an international clinical elective
   2. Identify ways that a student can prepare for the dilemmas they might face
   3. Name individuals to contact when faced with an ethical dilemma at an international site
   4. Identify strategies for managing conflicting impulses, emotions, and motivations when facing an ethical dilemma

Free Response Questions

1. What ethical dilemmas do you anticipate encountering during your international clinical elective?

Post-Trip Questionnaire – Sample Questions

Closed-Ended Questions

1. To what site did you travel for your international clinical elective?
2. Did you attend the global health ethics training prior to your international clinical elective?
3. What do you think is the likelihood that a medical student will experience an ethical dilemma while on an international clinical elective? [Scale 0%-100%]
4. How prepared were you to appropriately manage an ethical dilemma while on your international clinical elective? [Unprepared, Somewhat unprepared, Neither prepared nor unprepared, Somewhat prepared, Prepared]
5. Please rate your ability to do each of the following [Low, Moderately Low, Moderate, Moderately High, High]:
   1. Describe at least 3 categories of ethical dilemmas that a student may face on an international clinical elective
   2. Identify ways that a student can prepare for the dilemmas they might face
   3. Name individuals to contact when faced with an ethical dilemma at an international site
   4. Identify strategies for managing conflicting impulses, emotions, and motivations when facing an ethical dilemma

Free Response Questions

1. Did you experience or witness an ethical dilemma while abroad?
   1. Please describe the ethical dilemma or dilemmas you faced during your international clinical elective.
   2. Who did you talk to about the ethical dilemma you faced?
   3. What other coping strategies did you employ to handle the situation?
